# Supplementary material for: Exosomes from adipose-derived stem cells alleviate premature ovarian failure via blockage of autophagy and AMPK/mTOR pathway
Source: PeerJ journal article supplement (doi:10.7717/peerj.16517), 2023-12-14

# Figure 3C

## Bcl-2

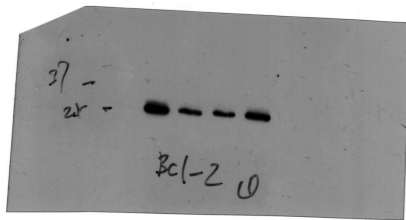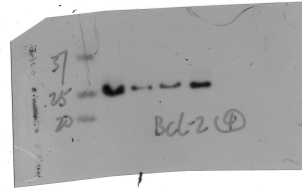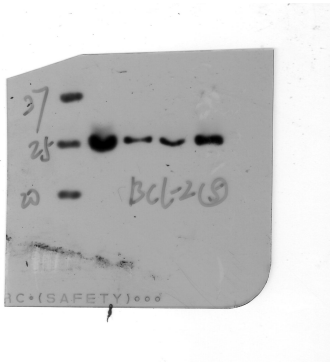

## Beclin-1

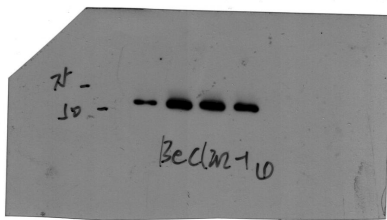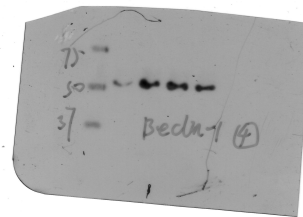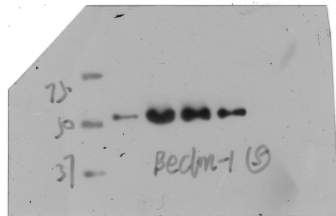

## LC3 I

## LC3 II

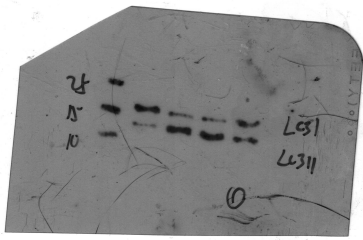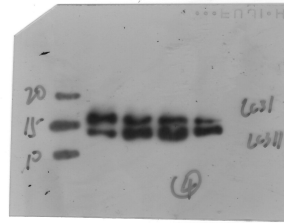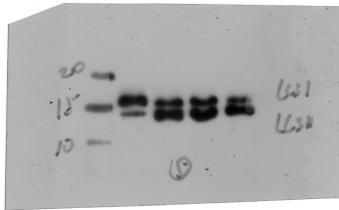

**AMPK**

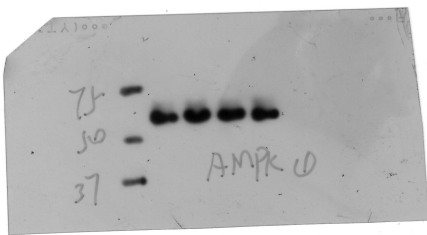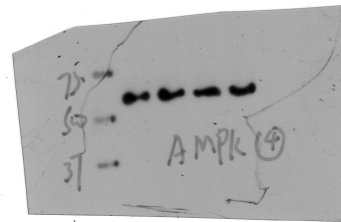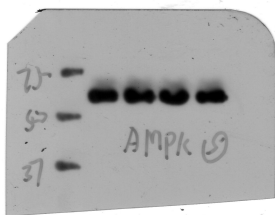

**p-AMPK**

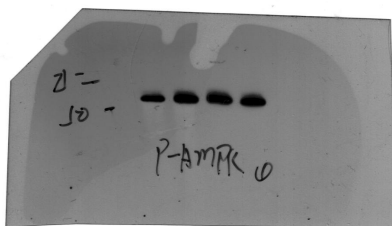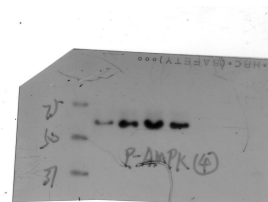

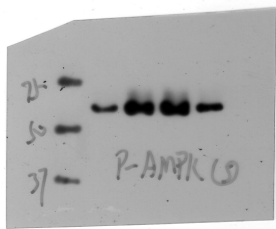

## mTOR

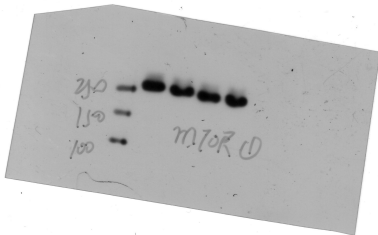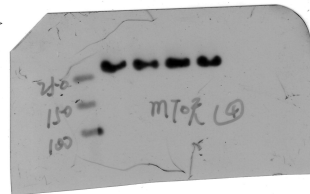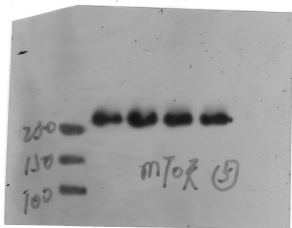

## p-mTOR

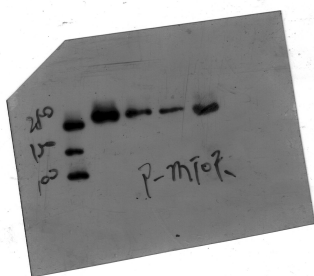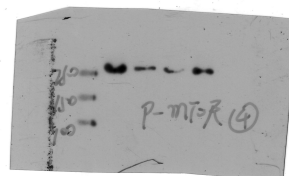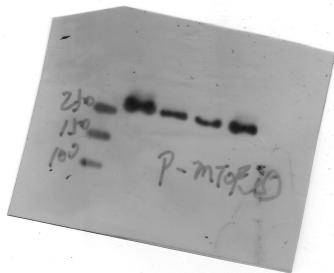

# GAPDH

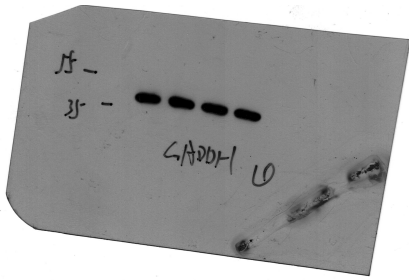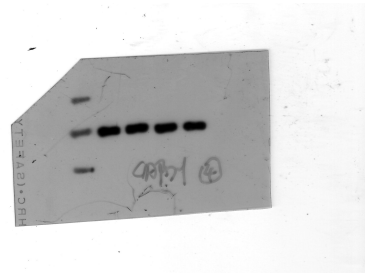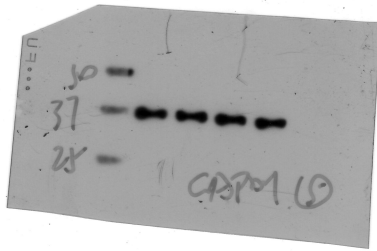



# Figure 4B

## CD63

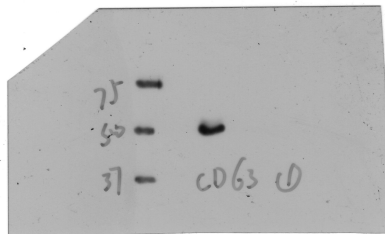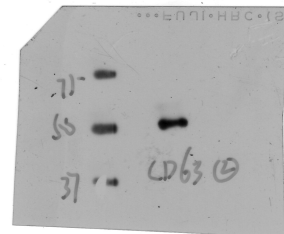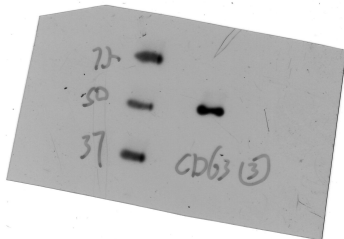

## CD81

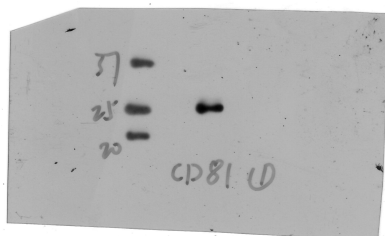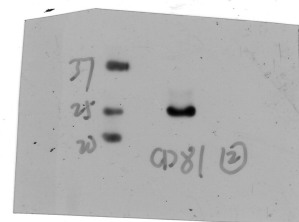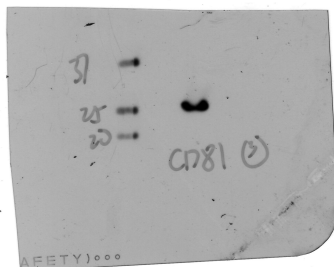

## TSG101

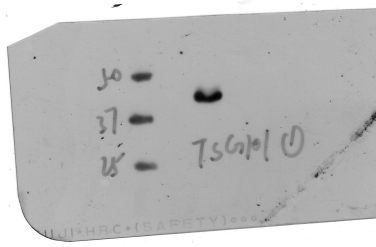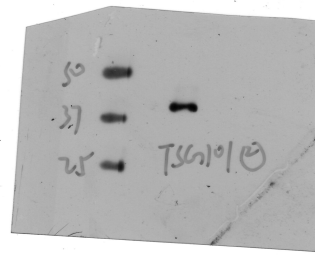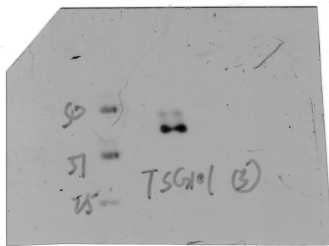

### HSP70

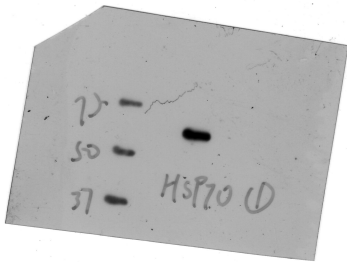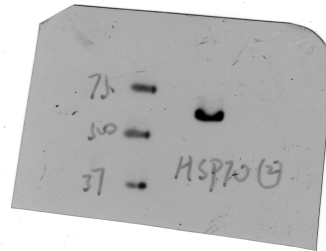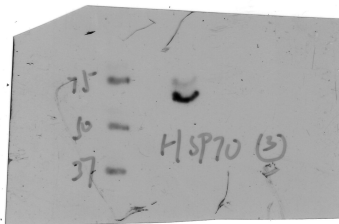

### $\beta$ -Actin

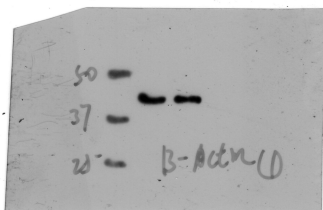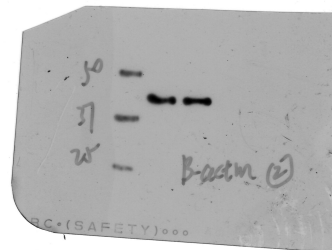

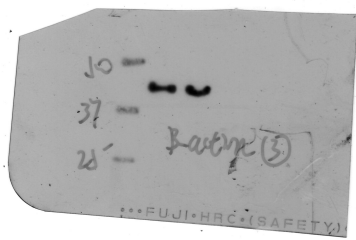

# Figure 5C

## Bcl-2

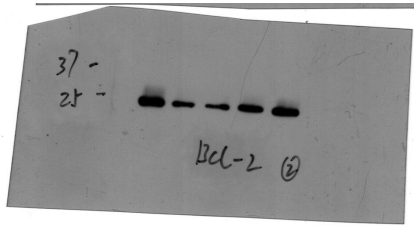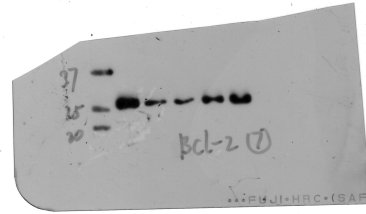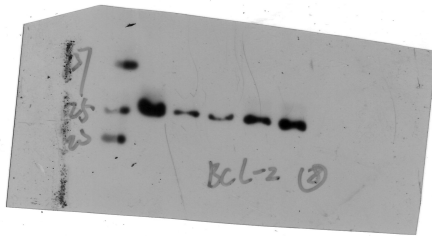

## Beclin-1

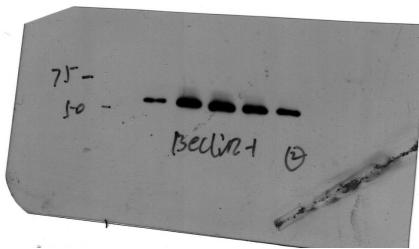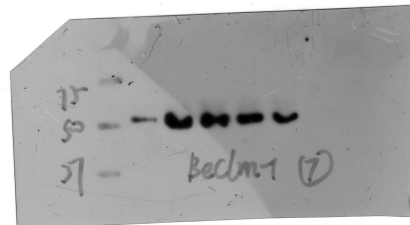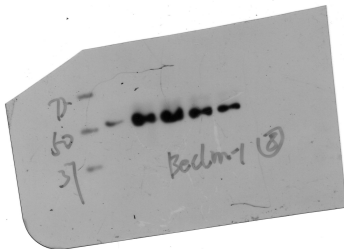

## LC3 I

## LC3 II

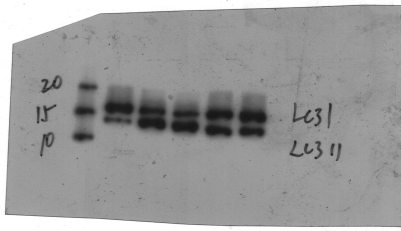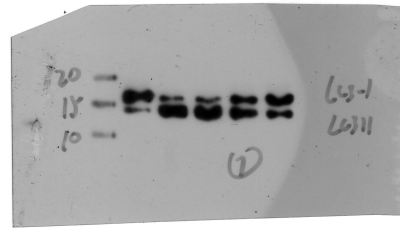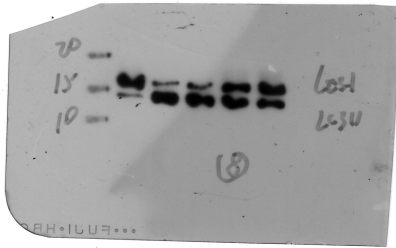

## p-AMPK

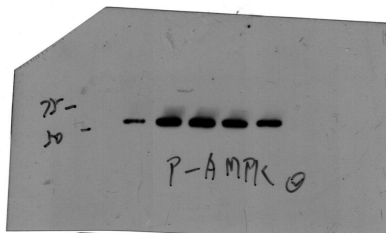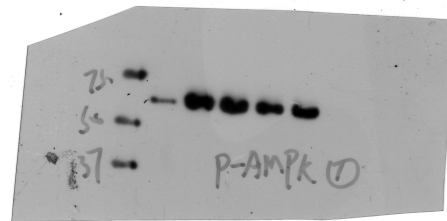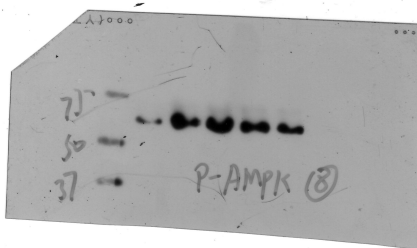

## p-mTOR

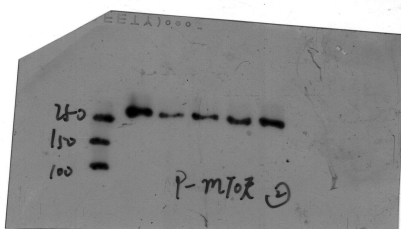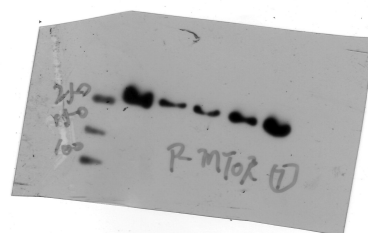

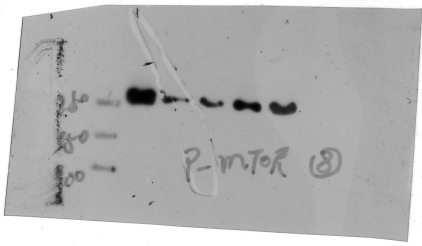

## GAPDH

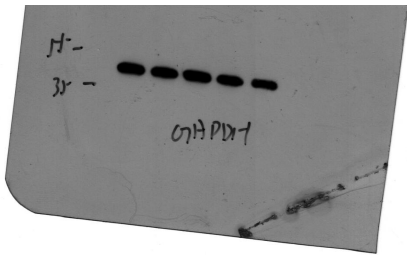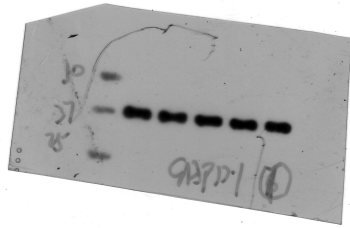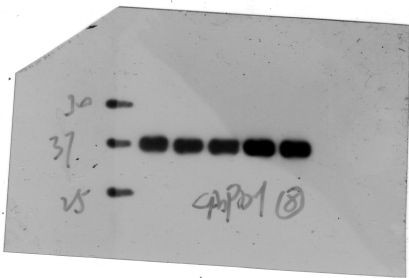

# Figure 6

AMPK

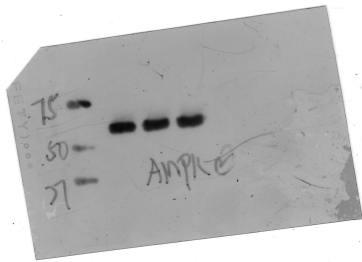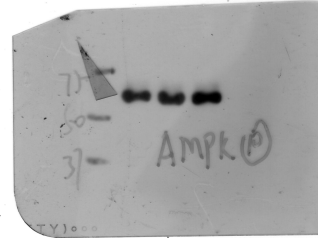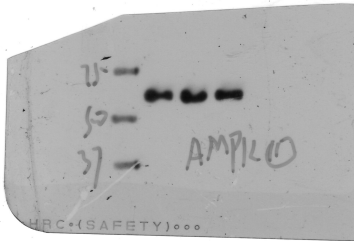

p-AMPK

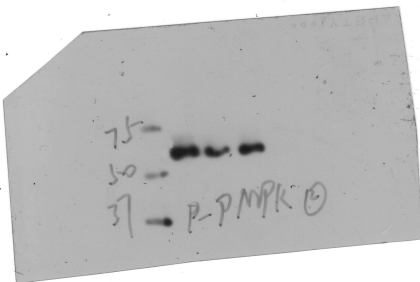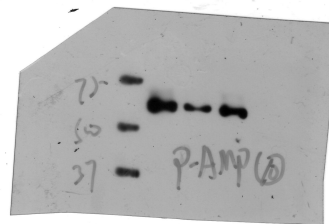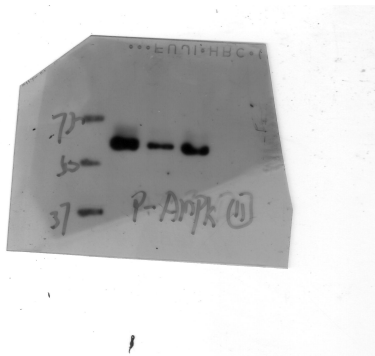

mTOR

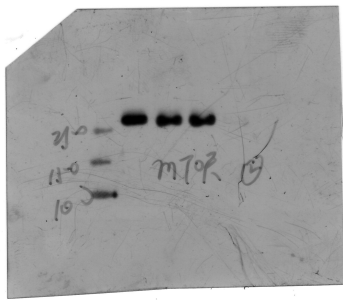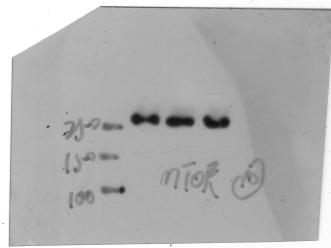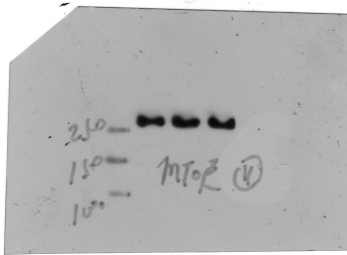

### p-mTOR

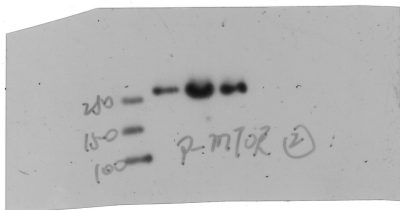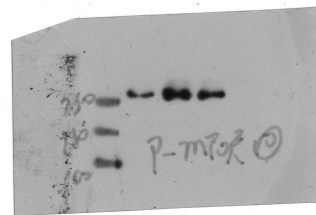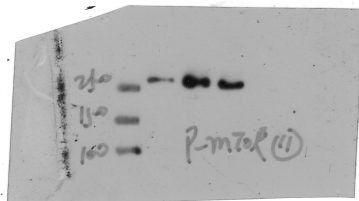

### Bcl-2

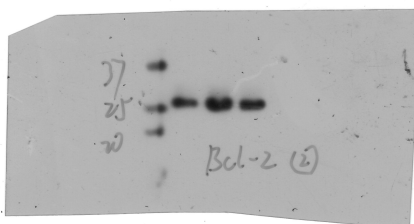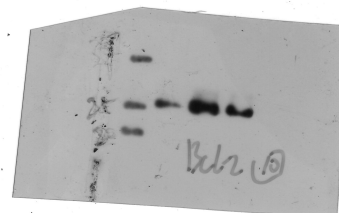



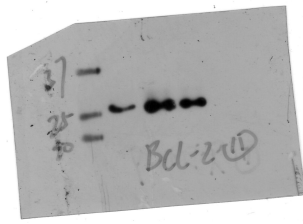

**Beclin-1**

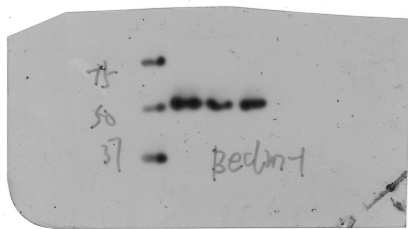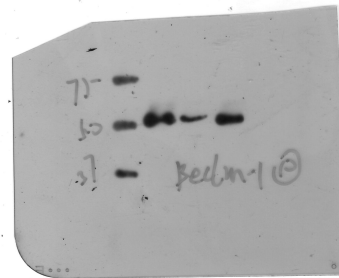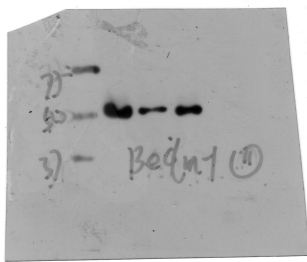

**LC3 I**

**LC3 II**

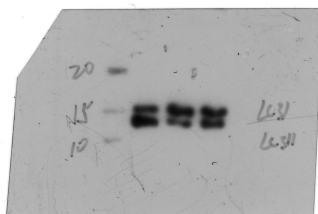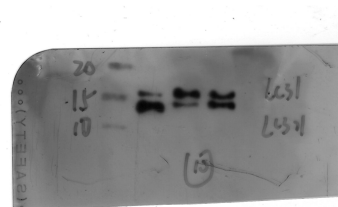

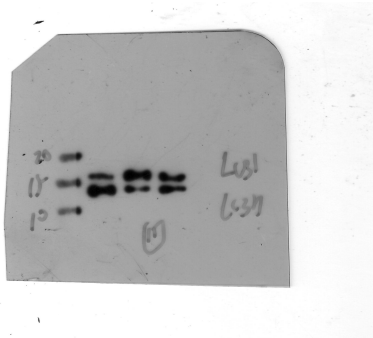

## GAPDH

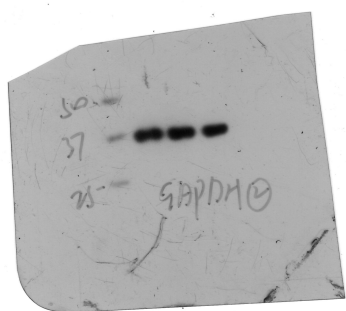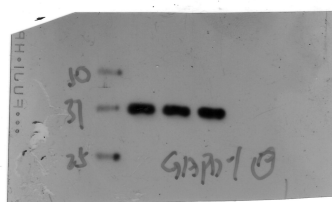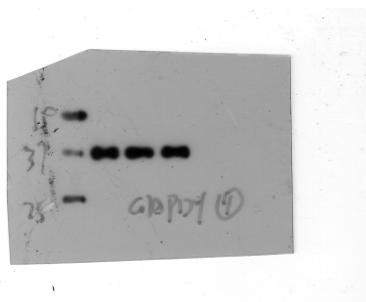

# Figure 8D

## Bcl-2

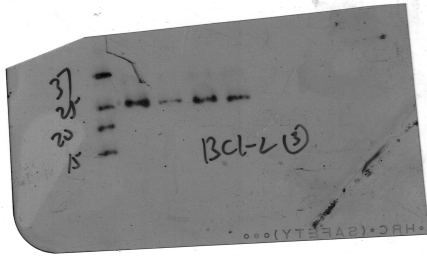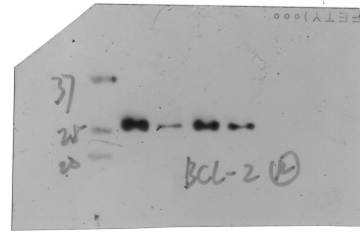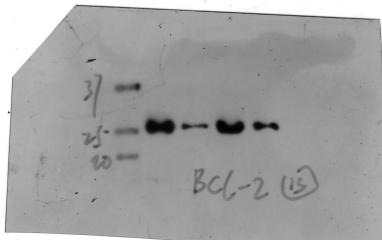

## Beclin-1

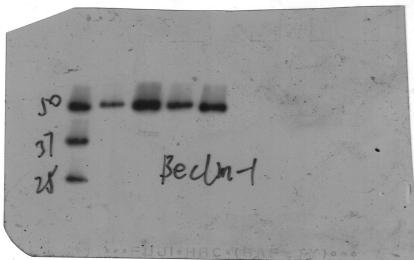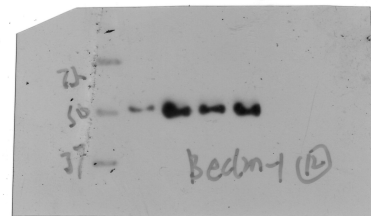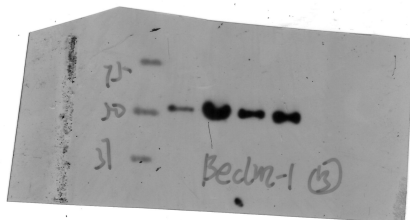

## LC3 I

## LC3 II

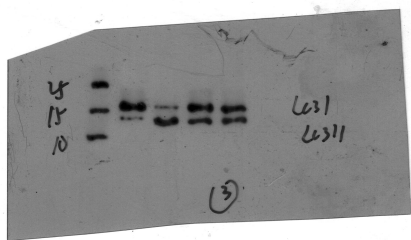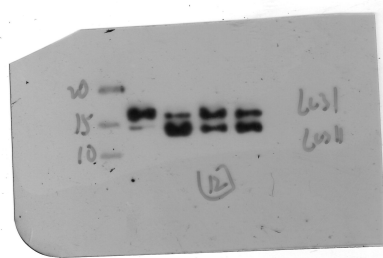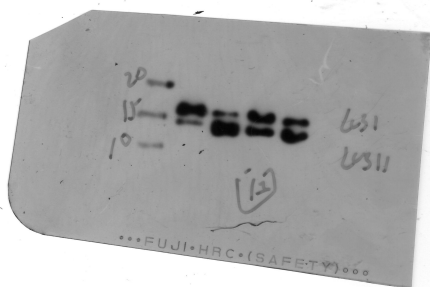

### AMPK

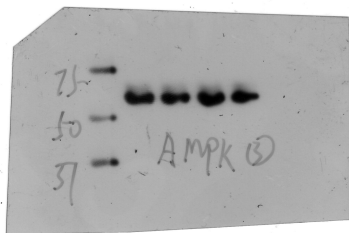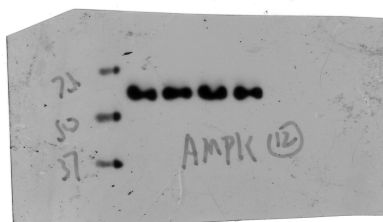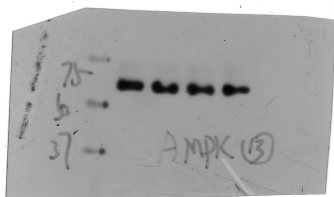

### p-AMPK

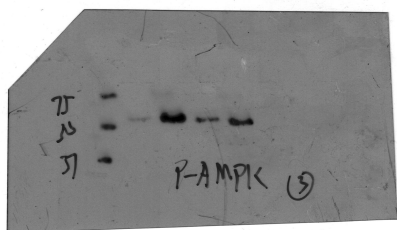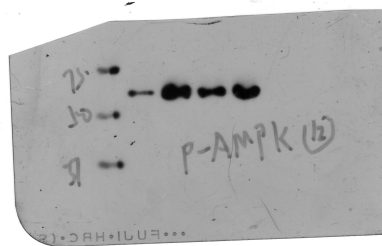

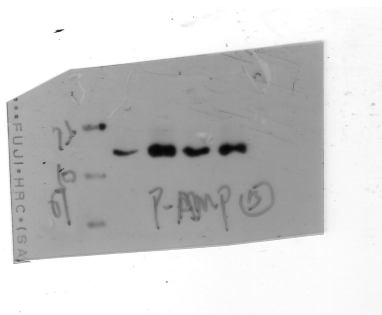

**mTOR**

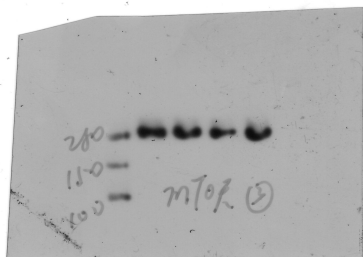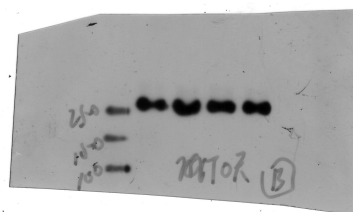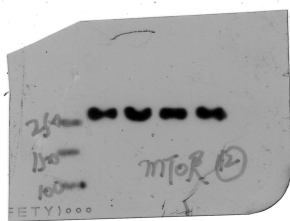

**p-mTOR**

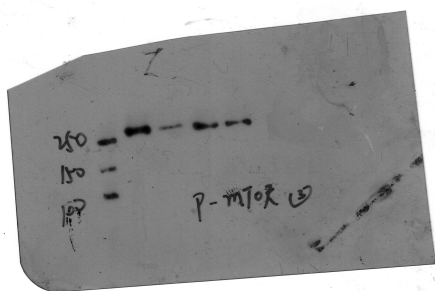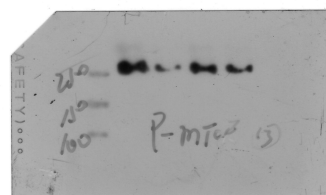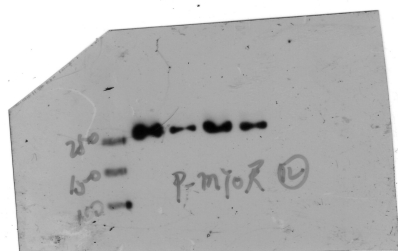

**GAPDH**

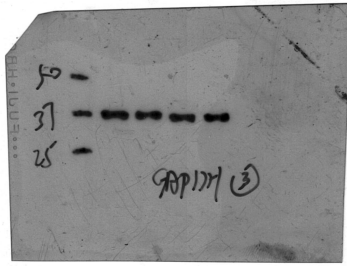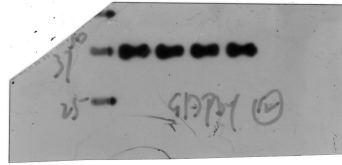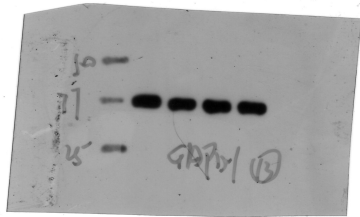

Supplement: Threefold_repetition_of_western_blots.pdf [file Threefold_repetition_of_western_blots.pdf]
