# Supplementary material for: Exosomes from adipose-derived stem cells alleviate premature ovarian failure via blockage of autophagy and AMPK/mTOR pathway
Source: PeerJ journal article supplement (doi:10.7717/peerj.16517), 2023-12-14

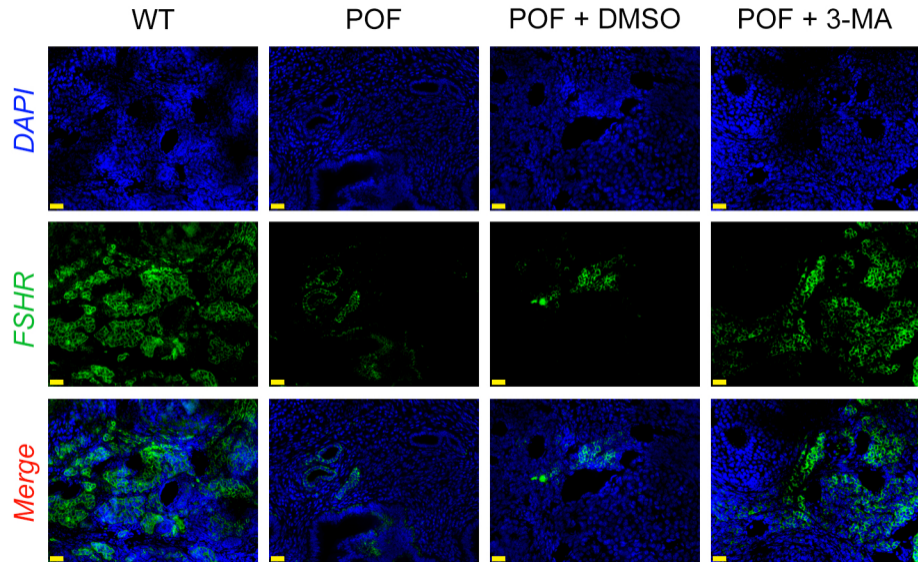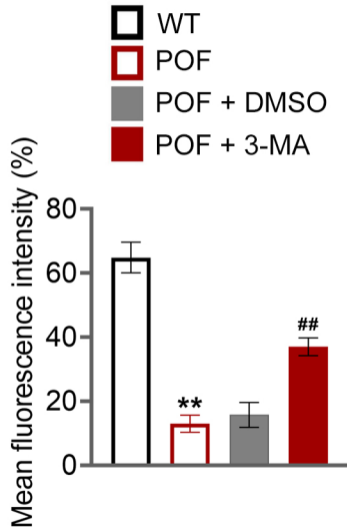

Supplement: Fig_S1.pdf [file Fig_S1.pdf]
