# Supplementary material for: Exosomes from adipose-derived stem cells alleviate premature ovarian failure via blockage of autophagy and AMPK/mTOR pathway
Source: PeerJ journal article supplement (doi:10.7717/peerj.16517), 2023-12-14

Figure 3

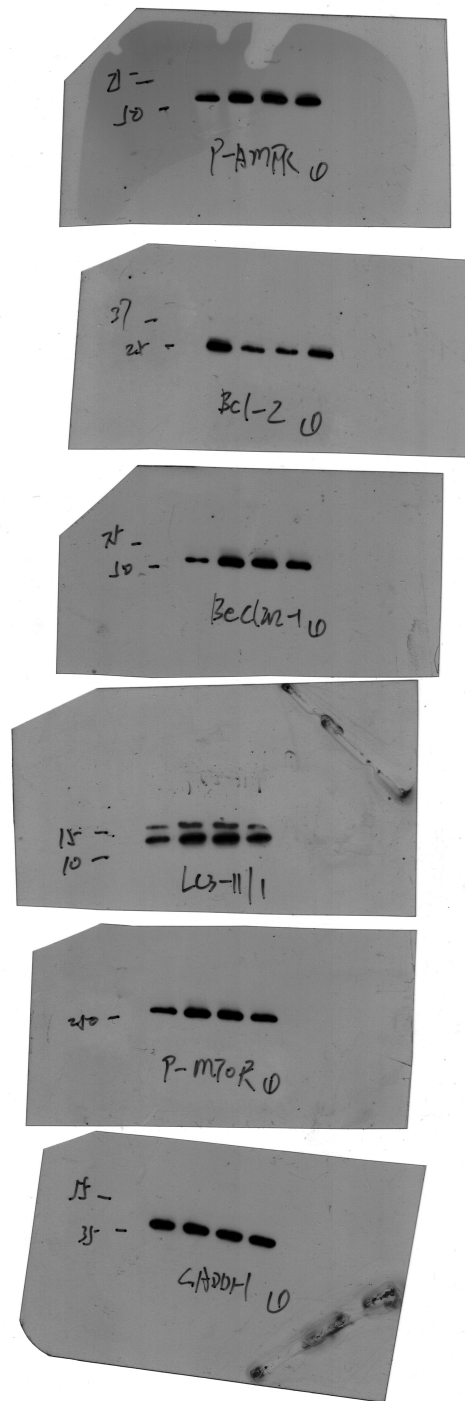

Figure 4B

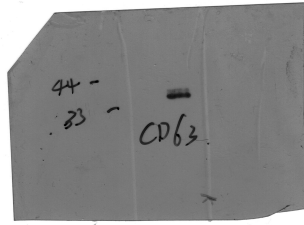

Figure 5C

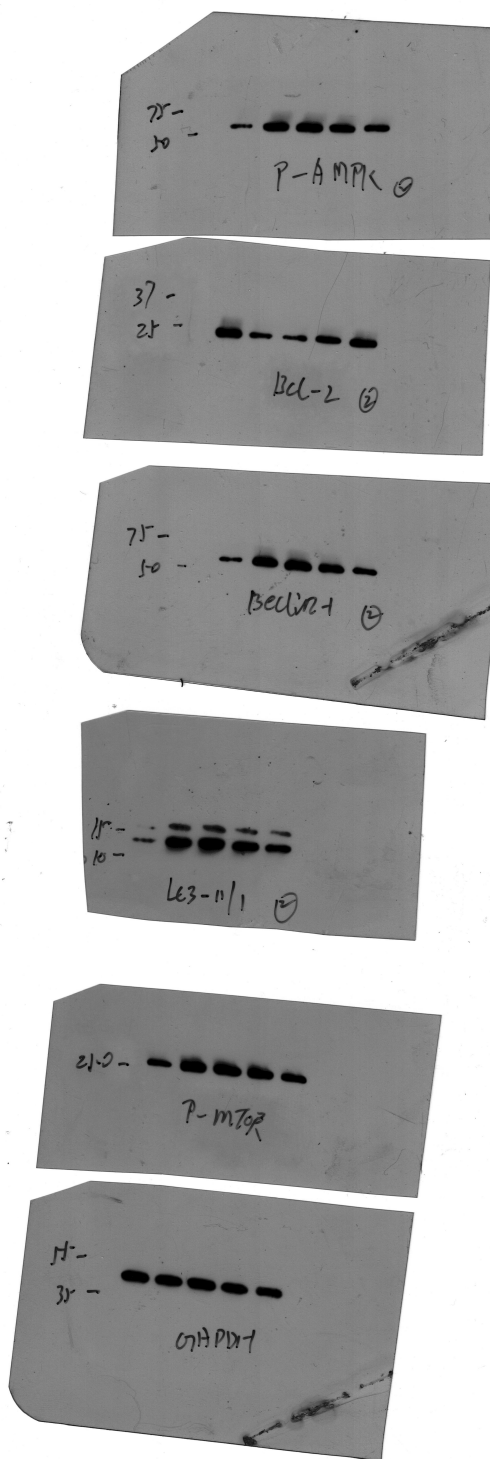

Figure 6C

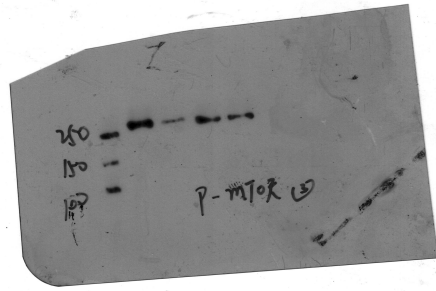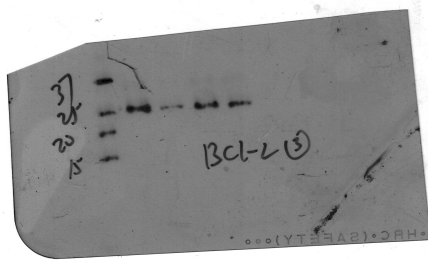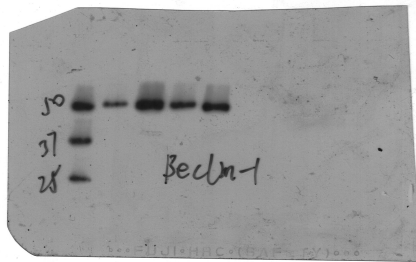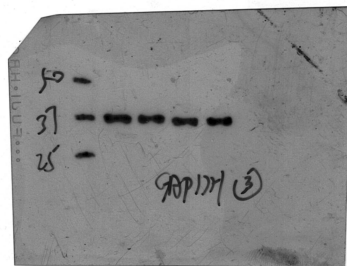

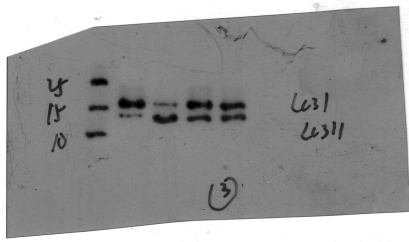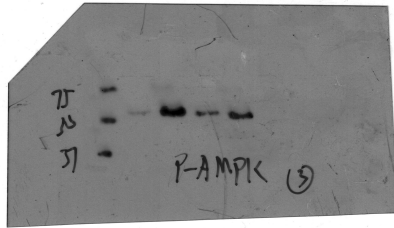

Supplement: Western_Blots.pdf [file Western_Blots.pdf]
